# Supplementary material for: Are the Italian Children Exposed to Advertisements of Nutritionally Appropriate Foods?
Source: MDPI journal article supplement (doi:10.3390/foods9111632), 2020-11-08
Supplement: s1 [file s1]

**Table S1.** Anonymous questionnaire administered.

Dear parent,

This questionnaire is part of a research project performed by the Perugia University. The aim of this project is to monitor advertisements aired by TV channels and directed to Italian children. For this reason we need to understand which TV channels are more viewed by children. This questionnaire is anonymous and no personal information will be collected. It is based on 4 simple questions and it will only take a few minutes. Your contribution is fundamental for our research. Thank you for your contribution.

1.How many children do you have in your family unit? \*\*

- 1 *Skip to question 2*
- 2 *Skip to question 5*
- 3 *Skip to question 11*
- 4 *Skip to question 20*

2.What is your first child's gender? \*

- male
- female

3.How old is your first child? \*

- from 1 to 5 years
- from 6 to 10 years
- from 11 to 13 years
- from 14 to 16 years
- Other \_\_\_\_\_

4.Which of the following are the 5 most viewed channels by your first child. \*

*Tick all that apply.*

- Boing
- K2
- Frisbee
- Rai yoyo
- Rai Gulp
- Cartoonito
- Rai 1
- Rai 2
- Rai 3
- Canale 5

- Italia 1
- Other \_\_\_\_\_

\*In order to increase the number of answers to the questionnaire, parents had to provide information about the gender, age and the five most viewed channel for each of their children. The questionnaire was made so that depending on the number of children, parents were redirected to the section of the questionnaire where they could answer to the questions for each child.

\* Required

**Table S2.** Program category codes based on the WHO monitoring protocol and their definition [19].

| <b>Programme</b>                | <b>Programme Definition</b>                                                                  |
|---------------------------------|----------------------------------------------------------------------------------------------|
| 1= Comedy                       | Television series where humour was the main topic                                            |
| 2 = Drama                       | Television series where humour was not the main topic                                        |
| 3 = Movie                       | Programmes that where first aired in theatres                                                |
| 4 = Soap opera                  | Programmes with recurring characters dealing with daily events                               |
| 5 = Music/Music video           | Concerts and programmes where music was the main topic                                       |
| 6 = News/Commentary             | Programmes that gave information or discussed actual events                                  |
| 7 = Talk show                   | Programmes with hosts talking about different topics                                         |
| 8 = Reality show                | Characters being filmed on real-life situations                                              |
| 9 = Sports show                 | Sports competitions and programmes with sport as the main topic                              |
| 10 = Entertainment/Variety show | Programmes with hosts doing different types of performances                                  |
| 11 = Documentary show           | Programmes that gave a factual report on a given topic                                       |
| 12 = Game show                  | Programmes where participants played to win a prize                                          |
| 13 = Children's show            | Programmes specifically targeted to children based on characters and themes of the programme |
| 14 = Infomercial                | Programmes made to advertise branded products                                                |
| 15 = Other                      | All programmes that did not fit the previous categories                                      |
